# Supplementary material for: Risk and protection of different rare protein-coding variants of complement component C4A in age-related macular degeneration
Source: Front Genet. 2024 Jan 29;14:1274743. doi: 10.3389/fgene.2023.1274743 (PMC10859408; doi:10.3389/fgene.2023.1274743)
Supplement: Supplementary file 1 [file Table2.xlsx]

## Sheet: Supplemental Table 2
Supplemental Table 2. Pair-wise LD (r) results of variants in or near CFB-C2 locus and C4A copy number variants.
	rs3117574	rs3131378	rs145011851	rs141736701	rs11531	rs2227956	rs6457452	rs114837463	rs12661281	rs148049729	rs2243873	rs9332739	rs641153	rs17201431	rs45600936	rs541862	rs1270942	rs522162	rs36038685	rs149004575	C4A_c.3358C>A_p.Pro1120Thr	C4A_c.3615G>A_p.Ala1205Ala	C4A_c.3620T>C_p.Val1207Ala	C4A_c.3629T>A_p.Leu1210His	C4B_c.3726G>A_p.Ser1242Ser	C4A_c.3629T>G_p.Leu1210Arg
rs3117574	1	-0.00133567	-0.00124572	-0.00149943	-0.000444458	-0.000444458	-0.000444458	-0.00137177	-0.0064755	-0.0132108	-0.000769977	-0.00840806	-0.0118286	-0.000444458	-0.00507511	-0.0119443	-0.00144054	-0.0119227	-0.00550737	-0.00115621	-0.00197097	-0.00844839	-0.00875309	0.0089277	-0.00592212	0.0070692
rs3131378	-0.00133567	1	0.990078	0.984881	-0.00704722	-0.00704722	-0.00704722	0.986045	-0.141964	0.629362	0.0250387	-0.0690947	-0.100569	-0.00704722	-0.0411138	-0.100527	0.96089	-0.100999	-0.0317466	0.960807	0.00605755	0.00997307	0.00446463	0.00964211	-0.0559135	-0.00425847
rs145011851	-0.00124572	0.990078	1	0.982143	-0.00706118	-0.00706118	-0.00706118	0.986536	-0.142137	0.628522	0.0253273	-0.0652217	-0.1015	-0.00706118	-0.038108	-0.101454	0.963216	-0.101921	-0.0341216	0.960976	0.00630897	0.00733279	0.0019119	0.00939306	-0.0557805	0.00981473
rs141736701	-0.00149943	0.984881	0.982143	1	-0.00714685	-0.00714685	-0.00714685	0.977191	-0.141963	0.628133	0.0250186	-0.067134	-0.102865	0.0252359	-0.0420903	-0.10284	0.963341	-0.10203	-0.0300962	0.956996	0.00576858	0.00866889	0.00308937	0.00793559	-0.0523177	0.00836427
rs11531	-0.000444458	-0.00704722	-0.00706118	-0.00714685	1	-0.000198689	-0.000198689	-0.00703111	0.01926	-0.0106922	-0.000344207	-0.0037587	-0.00528779	-0.000198689	-0.00226876	-0.00533952	-0.00711455	-0.00532987	-0.00246199	-0.0070054	-0.000881095	-0.00377673	-0.00391295	-0.00490263	-0.0026474	-0.00425847
rs2227956	-0.000444458	-0.00704722	-0.00706118	-0.00714685	-0.000198689	1	-0.000198689	-0.00703111	-0.00843349	-0.0106922	-0.000344207	0.0515668	-0.00528779	-0.000198689	-0.00226876	-0.00533952	-0.00711455	-0.00532987	-0.00246199	-0.0070054	-0.000881095	-0.00377673	-0.00391295	-0.00490263	-0.0026474	-0.00425847
rs6457452	-0.000444458	-0.00704722	-0.00706118	-0.00714685	-0.000198689	-0.000198689	1	-0.00703111	0.01926	-0.0106922	-0.000344207	-0.0037587	-0.00528779	-0.000198689	-0.00226876	-0.00533952	-0.00711455	-0.00532987	-0.00246199	-0.0070054	-0.000881095	-0.00377673	-0.00391295	-0.00490263	-0.0026474	-0.00425847
rs114837463	-0.00137177	0.986045	0.986536	0.977191	-0.00703111	-0.00703111	-0.00703111	1	-0.143843	0.632098	0.0248804	-0.0637861	-0.105667	0.0250583	-0.0411267	-0.105663	0.963706	-0.106086	-0.0344582	0.96782	0.00594247	0.0077917	0.0023484	0.00769536	-0.058251	0.00219181
rs12661281	-0.0064755	-0.141964	-0.142137	-0.141963	0.01926	-0.00843349	0.01926	-0.143843	1	-0.221912	0.017374	0.0396	-0.103621	-0.00843349	-0.0383651	-0.10168	-0.139845	-0.105703	-0.0476871	-0.13566	-0.0107013	0.176899	0.185157	0.237611	-0.0471335	0.222843
rs148049729	-0.0132108	0.629362	0.628522	0.628133	-0.0106922	-0.0106922	-0.0106922	0.632098	-0.221912	1	0.00911745	-0.114898	-0.128884	0.0132405	-0.0615939	-0.126789	0.632033	-0.126795	0.201381	0.629856	-0.0151145	-0.068743	-0.0748085	-0.0872006	-0.0614238	-0.0868964
rs2243873	-0.000769977	0.0250387	0.0253273	0.0250186	-0.000344207	-0.000344207	-0.000344207	0.0248804	0.017374	0.00911745	1	-0.00651156	0.0137476	-0.000344207	-0.00393039	0.0138134	0.0250401	0.0136186	-0.00426514	0.0253329	-0.0015264	-0.00654279	-0.00677877	-0.00849328	-0.00458634	-0.00737713
rs9332739	-0.00840806	-0.0690947	-0.0652217	-0.067134	-0.0037587	0.0515668	-0.0037587	-0.0637861	0.0396	-0.114898	-0.00651156	1	-0.0385906	-0.0037587	-0.018807	-0.0369432	-0.0719545	-0.0373481	-0.0238746	-0.0661267	-0.0166682	-0.0257229	-0.0236899	-0.0337121	-0.0256455	-0.0314726
rs641153	-0.0118286	-0.100569	-0.1015	-0.102865	-0.00528779	-0.00528779	-0.00528779	-0.105667	-0.103621	-0.128884	0.0137476	-0.0385906	1	-0.00528779	-0.0500059	0.982599	-0.105935	0.981961	-0.0297129	-0.105372	-0.0158003	0.0371867	0.0338573	0.0370768	0.42016	0.032029
rs17201431	-0.000444458	-0.00704722	-0.00706118	0.0252359	-0.000198689	-0.000198689	-0.000198689	0.0250583	-0.00843349	0.0132405	-0.000344207	-0.0037587	-0.00528779	1	-0.00226876	-0.00533952	0.0252383	-0.00532987	-0.00246199	0.0254373	-0.000881095	-0.00377673	-0.00391295	-0.00490263	-0.0026474	-0.00425847
rs45600936	-0.00507511	-0.0411138	-0.038108	-0.0420903	-0.00226876	-0.00226876	-0.00226876	-0.0411267	-0.0383651	-0.0615939	-0.00393039	-0.018807	-0.0500059	-0.00226876	1	-0.0470449	-0.0389379	-0.0505118	-0.0209584	-0.0432299	-0.0100609	-0.0383218	-0.0400149	-0.0521053	-0.0302298	-0.0457329
rs541862	-0.0119443	-0.100527	-0.101454	-0.10284	-0.00533952	-0.00533952	-0.00533952	-0.105663	-0.10168	-0.126789	0.0138134	-0.0369432	0.982599	-0.00533952	-0.0470449	1	-0.10593	0.986615	-0.0301111	-0.104056	-0.0159778	0.0305358	0.0273623	0.0316097	0.431619	0.0313524
rs1270942	-0.00144054	0.96089	0.963216	0.963341	-0.00711455	-0.00711455	-0.00711455	0.963706	-0.139845	0.632033	0.0250401	-0.0719545	-0.105935	0.0252383	-0.0389379	-0.10593	1	-0.106366	-0.0324048	0.97486	0.00587726	0.00736702	0.0018614	0.0114394	-0.0543085	0.013305
rs522162	-0.0119227	-0.100999	-0.101921	-0.10203	-0.00532987	-0.00532987	-0.00532987	-0.106086	-0.105703	-0.126795	0.0136186	-0.0373481	0.981961	-0.00532987	-0.0505118	0.986615	-0.106366	1	-0.030322	-0.105771	-0.00837567	0.031689	0.0284551	0.0321094	0.427138	0.0327837
rs36038685	-0.00550737	-0.0317466	-0.0341216	-0.0300962	-0.00246199	-0.00246199	-0.00246199	-0.0344582	-0.0476871	0.201381	-0.00426514	-0.0238746	-0.0297129	-0.00246199	-0.0209584	-0.0301111	-0.0324048	-0.030322	1	-0.0335598	-0.0109178	-0.0377539	-0.0397013	-0.042504	0.00949051	-0.0419774
rs149004575	-0.00115621	0.960807	0.960976	0.956996	-0.0070054	-0.0070054	-0.0070054	0.96782	-0.13566	0.629856	0.0253329	-0.0661267	-0.105372	0.0254373	-0.0432299	-0.104056	0.97486	-0.105771	-0.0335598	1	0.00646516	0.00983753	0.004405	0.0117668	-0.0527418	0.0120114
C4A_c.3358C>A_p.Pro1120Thr	-0.00197097	0.00605755	0.00630897	0.00576858	-0.000881095	-0.000881095	-0.000881095	0.00594247	-0.0107013	-0.0151145	-0.0015264	-0.0166682	-0.0158003	-0.000881095	-0.0100609	-0.0159778	0.00587726	-0.00837567	-0.0109178	0.00646516	1	-0.0167481	-0.0173522	-0.0217409	-0.01174	-0.0198038
C4A_c.3615G>A_p.Ala1205Ala	-0.00844839	0.00997307	0.00733279	0.00866889	-0.00377673	-0.00377673	-0.00377673	0.0077917	0.176899	-0.068743	-0.00654279	-0.0257229	0.0371867	-0.00377673	-0.0383218	0.0305358	0.00736702	0.031689	-0.0377539	0.00983753	-0.0167481	1	0.94602	0.747173	-0.0462658	0.745065
C4A_c.3620T>C_p.Val1207Ala	-0.00875309	0.00446463	0.0019119	0.00308937	-0.00391295	-0.00391295	-0.00391295	0.0023484	0.185157	-0.0748085	-0.00677877	-0.0236899	0.0338573	-0.00391295	-0.0400149	0.0273623	0.0018614	0.0284551	-0.0397013	0.004405	-0.0173522	0.94602	1	0.76016	-0.0481972	0.765911
C4A_c.3629T>A_p.Leu1210His	0.0089277	0.00964211	0.00939306	0.00793559	-0.00490263	-0.00490263	-0.00490263	0.00769536	0.237611	-0.0872006	-0.00849328	-0.0337121	0.0370768	-0.00490263	-0.0521053	0.0316097	0.0114394	0.0321094	-0.042504	0.0117668	-0.0217409	0.747173	0.76016	1	-0.0587773	NA
C4B_c.3726G>A_p.Ser1242Ser	-0.00592212	-0.0559135	-0.0557805	-0.0523177	-0.0026474	-0.0026474	-0.0026474	-0.058251	-0.0471335	-0.0614238	-0.00458634	-0.0256455	0.42016	-0.0026474	-0.0302298	0.431619	-0.0543085	0.427138	0.00949051	-0.0527418	-0.01174	-0.0462658	-0.0481972	-0.0587773	1	-0.0546795
C4A_c.3629T>G_p.Leu1210Arg	0.0070692	-0.00425847	0.00981473	0.00836427	-0.00425847	-0.00425847	-0.00425847	0.00219181	0.222843	-0.0868964	-0.00737713	-0.0314726	0.032029	-0.00425847	-0.0457329	0.0313524	0.013305	0.0327837	-0.0419774	0.0120114	-0.0198038	0.745065	0.765911	NA	-0.0546795	1
*The two novel rare variants we reported in Table 1 are highlighted in red.
**We highlight the strong correlation between variants corresponding to C4A V1207A and C4A L1210R
SNPs in this table which are either previously reported in association with AMD or with C4A copy number in LD r2>0.7 .
