# Supplementary material for: Risk and protection of different rare protein-coding variants of complement component C4A in age-related macular degeneration
Source: Front Genet. 2024 Jan 29;14:1274743. doi: 10.3389/fgene.2023.1274743 (PMC10859408; doi:10.3389/fgene.2023.1274743)
Supplement: Supplementary file 2 [file Table3.xlsx]

## Sheet: Supplemental Table 3
Supplemental Table 3. Conditional analysis on known AMD risk variants in or near CFB-C2 locus and C4A copy number variants.
Variant ID	P	P on rs3117574	P on rs3131378	P on rs145011851	P on rs141736701	P on rs11531	P on rs2227956	P on rs6457452	P on rs114837463	P on rs12661281	P on rs148049729	P on rs2243873	P on rs9332739	P on rs641153	P on rs17201431	P on rs45600936	P on rs541862	P on rs1270942	P on rs522162	P on rs36038685	P on rs149004575
C4A_c.3358C>A_p.Pro1120Thr	0.0001584	0.00186397	0.00177208	0.00176895	0.00175949	0.00184979	0.00184979	0.00184979	0.00177767	0.0019186	0.00208118	0.00184481	0.00132426	0.00123667	0.00183779	0.00183904	0.0012112	0.00172785	0.00145574	0.00193686	0.00175884
C4A_c.3615G>A_p.Ala1205Ala	6.007e-05	6.34663e-05	6.96099e-05	6.85057e-05	6.94961e-05	6.58219e-05	6.58201e-05	6.58221e-05	6.86115e-05	0.000107009	3.22963e-05	6.66384e-05	0.000109645	2.1368e-05	6.786e-05	6.65192e-05	2.52872e-05	6.94439e-05	2.46778e-05	5.44747e-05	6.98395e-05
C4A_c.3620T>C_p.Val1207Ala	2.54e-05	2.62117e-05	2.80622e-05	2.76034e-05	2.78456e-05	2.72652e-05	2.72651e-05	2.72652e-05	2.76899e-05	4.49809e-05	1.21353e-05	2.76311e-05	4.42947e-05	9.28282e-06	2.81797e-05	2.75413e-05	1.10322e-05	2.75719e-05	1.0765e-05	2.21197e-05	2.80925e-05
C4A_c.3629T>A_p.Leu1210His	0.0001807	0.000156578	0.000157835	0.000157582	0.000157316	0.000148243	0.000148243	0.000148244	0.000155721	0.000264012	5.99446e-05	0.000150629	0.000292552	4.87905e-05	0.000154239	0.000149719	5.53569e-05	0.00016462	5.52959e-05	0.000119862	0.000160836
C4B_c.3726G>A_p.Ser1242Ser	0.0003264	0.000520603	0.000708866	0.000709799	0.000738981	0.000506636	0.000506642	0.000506636	0.000704389	0.000610779	0.000904341	0.000501739	0.000265729	0.550415	0.000494952	0.000494282	0.693382	0.000840968	0.631732	0.000473268	0.000719963
*The three novel rare variants we reported in Table 1 are highlighted in red.
The number is a P-value in association with AMD by conditioning on the SNP which is either previously reported in association with AMD or with C4A copy number in LD r2>0.7 .
