# Supplementary material for: Risk and protection of different rare protein-coding variants of complement component C4A in age-related macular degeneration
Source: Front Genet. 2024 Jan 29;14:1274743. doi: 10.3389/fgene.2023.1274743 (PMC10859408; doi:10.3389/fgene.2023.1274743)
Supplement: Supplementary file 3 [file Table1.xlsx]

## Sheet: Supplemental Table 1
Suplemental Table 1. Odds Ratios between our pooled analysis and fixed effect meta-analysis for each rare variant associated with AMD status.
CHR	BP	Marker	A1	A2	ARTS Case MAF	ARTS Control MAF	MMAP Case MAF	MMAP Control MAF	Pooled MAF	1000 Genomes MAF	gnomAD MAF	gnoMAD European MAF	Pooled Chi-Square	Pooled Odds Ratio	Pooled FDR	Fixed-effect Meta-analysis Coefficient	Fixed-effect Meta-analysis Standard Error	Fixed-effect Meta-analysis Odds Ratio	Fixed-effect Meta-analysis P	Heterogeneity Test P
1	196438293	rs12746984	A	G	0.0130905	0.023199	0.0157811	0.0253239	0.0347503	0.0092	0.0166	NA	12.97	0.5983	0.00838636	-0.519936	0.144224	0.594559	0.000312071	0.144224
1	196625997	rs12134975	A	G	0.0230507	0.0494505	0.0309628	0.0518257	0.0683198	0.023	0.0257	NA	38.3	0.5339	1.4036e-07	-0.639288	0.103723	0.527668	7.12e-10	0.103723
1	196634813	rs34182143	T	C	0.00199203	0.00732601	0.00759089	0.0153121	0.0140013	0.0042	0.0061	NA	12.87	0.4608	0.00870957	-0.796	0.222069	0.45113	0.000337764	0.222069
1	196637604	rs61819914	G	A	0.00939101	0.0213675	0.014183	0.0206125	0.0293522	0.0052	0.0129	NA	12.77	0.5766	0.00896821	-0.573369	0.15933	0.563624	0.000319908	0.15933
1	196641848	rs35661539	A	G	0.0193512	0.0103785	0.0183779	0.00588928	0.0315452	0.0062	0.0071	NA	17.63	2.346	0.00111917	0.832252	0.210525	2.29849	7.71e-05	0.210525
1	196643762	rs34181066	T	C	0.00284576	0.0164835	0.00719137	0.0117786	0.0156883	0.012	0.0072	NA	23.26	0.3799	9.8832e-05	NA	NA	NA	NA	NA
1	196646389	rs34050381	G	C	0.00939101	0.021978	0.0139832	0.0217903	0.0296896	0.0082	0.0162	NA	15.72	0.547	0.00251245	NA	NA	NA	NA	NA
1	196652280	rs35449482	C	A	0.00682982	0.018315	0.0113863	0.0217903	0.0249663	0.014	0.0175	NA	21.76	0.4683	0.000174941	-0.745497	0.16492	0.474498	6.17e-06	0.16492
1	196653180	rs35198449	A	T	0.00654525	0.0177045	0.0111866	0.0212014	0.0242915	0.0096	0.0146	NA	20.84	0.471	0.000248571	-0.739555	0.167125	0.477326	9.64e-06	0.167125
1	196656617	rs34853086	A	G	0.00682982	0.018315	0.0117859	0.0212014	0.025135	0.014	0.0177	NA	19.48	0.4874	0.000495293	NA	NA	NA	NA	NA
1	196669799	rs118060452	A	G	0.0774047	0.0970696	0.0902917	0.114252	0.18168	NA	0.0016	NA	12.61	0.7848	0.00956006	-0.285497	0.0726708	0.751641	8.54e-05	0.0726708
1	196669799	rs72201878	A	G	0.0774047	0.0970696	0.0902917	0.114252	0.18168	NA	0.0016	NA	12.61	0.7848	0.00956006	-0.285497	0.0726708	0.751641	8.54e-05	0.0726708
1	196671865	rs116827816	T	G	0.0071144	0.014652	0.00819017	0.0182568	0.0204116	0.012	0.0072	NA	18.13	0.4657	0.0008961	-0.774877	0.184012	0.46076	2.54e-05	0.184012
1	196675680	rs7513157	A	G	0.0196357	0.0347985	0.0229724	0.0382803	0.0516194	0.012	0.0186	NA	21.38	0.5815	0.000196794	-0.546456	0.118587	0.578998	4.06e-06	0.118587
1	196675799	rs35788722	C	A	0.0577689	0.0323565	0.0363564	0.0235571	0.0806343	0.0094	0.0233	NA	18.57	1.65	0.00076096	0.532218	0.117426	1.7027	5.83e-06	0.117426
1	196678518	rs76780329	A	G	0.0796813	0.0512821	0.0657211	0.041225	0.128711	0.012	0.0321	NA	25.52	1.591	3.98536e-05	0.481284	0.0930394	1.61815	2.3e-07	0.0930394
1	196678857	rs79837932	A	G	0.00682982	0.018315	0.0115861	0.0223793	0.0253036	0.014	0.0175	NA	22.22	0.467	0.000149845	NA	NA	NA	NA	NA
1	196681487	rs116810342	G	A	0.0165054	0.00671551	0.0661207	0.041225	0.0792848	0.012	0.032	NA	28.78	1.923	8.93444e-06	0.495343	0.117773	1.64106	2.6e-05	0.117773
1	196690065	rs74532934	T	A	0.00910643	0.019536	0.0133839	0.0212014	0.0281714	0.0082	0.0156	NA	13.26	0.565	0.00737579	-0.602085	0.162027	0.547669	0.000202446	0.162027
1	196690680	rs114580526	A	G	0.00682982	0.0128205	0.00739113	0.0159011	0.0183873	0.0078	0.0076	NA	13.75	0.494	0.00640218	NA	NA	NA	NA	NA
1	196693761	rs35505017	T	C	0.0463859	0.0189255	0.0331602	0.0129564	0.0644399	0.0058	0.0118	NA	39.71	2.488	7.6734e-08	NA	NA	NA	NA	NA
1	196696857	rs35634602	G	A	0.0677291	0.045177	0.0577307	0.0347468	0.111336	0.012	0.0265	NA	22.04	1.588	0.000158688	0.480944	0.100145	1.6176	1.57e-06	0.100145
1	196706642	rs35292876	T	C	0.0199203	0.00915751	0.0169796	0.00588928	0.0303644	0.0064	0.0073	0.0105	18.35	2.454	0.0008352	0.888129	0.216434	2.43058	4.07e-05	0.216434
1	196709359	rs34557289	A	C	0.0486625	0.0213675	0.0371554	0.0241461	0.0730432	0.012	0.0174	NA	24.91	1.876	4.83452e-05	0.636642	0.128616	1.89012	7.42e-07	0.128616
1	196712596	rs35274867	T	A	0.00682982	0.018315	0.0107871	0.0212014	0.0242915	0.014	0.0177	0.0143	22.57	0.4578	0.000136057	-0.783726	0.168928	0.456701	3.49e-06	0.168928
1	196715335	rs34231058	A	G	0.0173591	0.0500611	0.0327607	0.0612485	0.069332	0.047	0.0336	NA	61.7	0.4594	4.176e-12	-0.793514	0.102743	0.452253	1.13e-14	0.102743
1	196762784	rs12140421	G	A	0.00455322	0.0164835	0.00838993	0.0200236	0.0200742	0.0054	0.0079	NA	31.78	0.368	2.51952e-06	-0.784879	0.167638	0.456175	2.84e-06	0.167638
1	196764187	rs61822226	G	T	0.011383	0.028083	0.0167799	0.0241461	0.0355938	0.0054	0.0165	NA	18.22	0.5515	0.000875183	-0.472537	0.128347	0.623418	0.000231666	0.128347
1	196928188	rs41310132	G	A	0.00540694	0.0201465	0.00978825	0.0159011	0.0215924	0.012	0.0092	0.0143	22.47	0.4393	0.000139635	-0.818654	0.183578	0.441025	8.22e-06	0.183578
6	31725978	rs28399976	G	C	0.00682982	0.0201465	0.00998801	0.0176678	0.0231107	0.015	0.009	0.015	21.83	0.4552	0.00017226	-0.809345	0.177496	0.44515	5.12e-06	0.177496
6	31730568	rs17201144	G	A	0.0404098	0.0628816	0.0455453	0.0583039	0.0964912	0.043	0.0524	NA	15.31	0.7044	0.0029754	-0.358939	0.0911725	0.698417	8.25e-05	0.0911725
6	31782855	rs34378923	G	A	0.00569152	0.0177045	0.00699161	0.0141343	0.0182186	0.012	0.0072	NA	23.63	0.4025	8.72486e-05	NA	NA	NA	NA	NA
6	31802938	rs111432088	T	C	0.00540694	0.01221	0.00779065	0.0159011	0.0177126	0.0024	0.0107	0.0104	14.48	0.4796	0.00441596	-0.752834	0.197811	0.47103	0.000141333	0.197811
6	31903804	rs111255853	C	G	0.0219124	0.047619	0.0289652	0.048881	0.0646086	0.03	0.0352	0.039	37.81	0.5276	1.62655e-07	NA	NA	NA	NA	NA
6	31903804	rs9332739	C	G	0.0219124	0.047619	0.0289652	0.048881	0.0646086	0.03	0.0352	0.039	37.81	0.5276	1.62655e-07	NA	NA	NA	NA	NA
6	31914024	rs112487871	A	T	0.0204895	0.047619	0.028366	0.0500589	0.0635965	0.03	0.0352	0.0391	43.9	0.5015	1.80612e-08	-0.717871	0.108418	0.48779	3.56e-11	0.108418
6	31915144	rs4151669	A	G	0.0202049	0.047619	0.0281662	0.0506478	0.0634278	0.029	0.0351	0.0386	46.02	0.4935	8.1432e-09	-0.730643	0.10816	0.481599	1.43e-11	0.10816
6	31915532	rs4151670	T	C	0.0128059	0.0250305	0.014183	0.0318021	0.0355938	0.013	0.0195	0.0223	30.29	0.4709	4.84155e-06	NA	NA	NA	NA	NA
6	31916062	rs512559	G	A	0.0204895	0.0433455	0.0279664	0.0441696	0.0603914	0.043	0.0442	NA	29.19	0.5575	7.6212e-06	-0.592682	0.110456	0.552843	8.06e-08	0.110456
6	31918903	rs4151671	T	C	0.0204895	0.0482295	0.0269676	0.0459364	0.0614035	0.03	0.0354	0.039	41.75	0.5042	4.3152e-08	-0.705181	0.110341	0.494019	1.65e-10	0.110341
6	31919830	rs4151672	T	C	0.0204895	0.047619	0.028366	0.0482921	0.0630904	0.031	0.0352	0.039	40.95	0.5114	4.65326e-08	-0.692522	0.108746	0.500313	1.91e-10	0.108746
6	31935750	rs106287	A	G	0.0176437	0.032967	0.0217739	0.0335689	0.0475709	0.014	0.0158	0.0183	18	0.5951	0.000941731	NA	NA	NA	NA	NA
6	31935750	rs115278344	A	G	0.0176437	0.032967	0.0217739	0.0335689	0.0475709	0.014	0.0158	0.0183	18	0.5951	0.000941731	NA	NA	NA	NA	NA
6	31937037	rs116186833	T	C	0.0204895	0.0433455	0.0287655	0.0477032	0.0620783	0.045	0.0457	0.0298	32.56	0.5449	2.0184e-06	-0.620452	0.108802	0.537701	1.18e-08	0.108802
6	31937037	rs449283	T	C	0.0204895	0.0433455	0.0287655	0.0477032	0.0620783	0.045	0.0457	0.0298	32.56	0.5449	2.0184e-06	-0.620452	0.108802	0.537701	1.18e-08	0.108802
6	31937762	rs114879139	C	G	0.00569152	0.0115995	0.00719137	0.0153121	0.0170378	0.0032	0.0123	0.0109	13.58	0.4839	0.00673159	NA	NA	NA	NA	NA
6	31938635	rs115303587	C	G	0.0204895	0.0433455	0.0287655	0.0471143	0.0619096	0.045	0.0456	0.0294	31.69	0.5487	2.51952e-06	-0.613081	0.109022	0.54168	1.87e-08	0.109022
6	31938635	rs416002	C	G	0.0204895	0.0433455	0.0287655	0.0471143	0.0619096	0.045	0.0456	0.0294	31.69	0.5487	2.51952e-06	-0.613081	0.109022	0.54168	1.87e-08	0.109022
6	31939524	rs115085021	C	A	0.00569152	0.0115995	0.00719137	0.0153121	0.0170378	0.0032	0.0123	NA	13.58	0.4839	0.00673159	-0.738285	0.201099	0.477933	0.000241363	0.201099
6	31940029	rs114119121	A	G	0.00313034	0.0128205	0.00499401	0.0106007	0.0126518	0.0018	0.0046	0.0051	21.25	0.3587	0.000204726	-1.03633	0.239615	0.354756	1.53e-05	0.239615
6	31940029	rs75831035	A	G	0.00313034	0.0128205	0.00499401	0.0106007	0.0126518	0.0018	0.0046	0.0051	21.25	0.3587	0.000204726	-1.03633	0.239615	0.354756	1.53e-05	0.239615
6	31947917	rs114632474	T	C	0.0182129	0.0445665	0.0279664	0.0482921	0.0605601	0.029	0.0334	NA	41.4	0.5034	4.3152e-08	-0.713516	0.110865	0.489919	1.23e-10	0.110865
6	31964316	rs112483790	C	G	0.00341491	0.0018315	0.0577307	0.0394582	0.0625843	NA	0.0004	0.0161	16.28	1.709	0.00200741	NA	NA	NA	NA	NA
6	31964316	rs28357074	C	G	0.00341491	0.0018315	0.0577307	0.0394582	0.0625843	NA	0.0004	0.0161	16.28	1.709	0.00200741	NA	NA	NA	NA	NA
6	31964321	rs113814393	C	T	0.00654525	0.002442	0.0603276	0.0424028	0.0676451	NA	0.0018	0.0222	17.32	1.701	0.00126886	0.419053	0.132447	1.52052	0.00155654	0.132447
6	31964321	rs28357075	C	T	0.00654525	0.002442	0.0603276	0.0424028	0.0676451	NA	0.0018	0.0222	17.32	1.701	0.00126886	0.419053	0.132447	1.52052	0.00155654	0.132447
6	31964330	rs113443153	G	T	0.0458167	0.035409	0.0601278	0.040636	0.099359	NA	0.0025	0.0274	13.25	1.449	0.00737579	0.358175	0.10382	1.43072	0.000560636	0.10382
6	31964330	rs28357076	G	T	0.0458167	0.035409	0.0601278	0.040636	0.099359	NA	0.0025	0.0274	13.25	1.449	0.00737579	0.358175	0.10382	1.43072	0.000560636	0.10382
6	31964330	rs74322619	G	T	0.0458167	0.035409	0.0601278	0.040636	0.099359	NA	0.0025	0.0274	13.25	1.449	0.00737579	0.358175	0.10382	1.43072	0.000560636	0.10382
6	32009284	rs451652	A	G	0.0236198	0.0457875	0.028366	0.0453475	0.0635965	0.049	0.0463	NA	28.57	0.5682	9.42732e-06	-0.529134	0.104088	0.589115	3.71e-07	0.104088
6	32023903	rs440160	C	G	0.0216278	0.043956	0.0295645	0.0477032	0.0635965	0.044	0.0464	0.0306	29.83	0.5617	5.79727e-06	-0.586463	0.107513	0.556291	4.9e-08	0.107513
6	32046342	rs112578661	A	C	0.00654525	0.014652	0.00938873	0.0188457	0.0212551	0.042	0.0192	NA	16.75	0.4852	0.00168222	-0.744777	0.18138	0.47484	4.02e-05	0.18138
6	32063896	rs41270458	A	G	0.0128059	0.021978	0.0143827	0.0300353	0.034413	0.013	0.0175	0.0222	21.61	0.52	0.000183524	-0.684272	0.144756	0.504457	2.28e-06	0.144756
6	32065113	rs61746206	T	C	0.00654525	0.014652	0.00938873	0.0200236	0.0215924	0.042	0.0193	0.0349	18.88	0.4682	0.000664364	-0.782929	0.179536	0.457065	1.3e-05	0.179536
10	124178759	rs41302731	G	A	0.0224815	0.00976801	0.0195765	0.0117786	0.0359312	0.0028	0.0136	NA	13.54	1.945	0.0067628	NA	NA	NA	NA	NA
10	124216821	rs79021034	T	G	0.0748435	0.0128205	0.00019976	0	0.0480769	NA	0.0015	NA	62.3	5.048	4.176e-12	1.90054	0.230962	6.6895	1.89e-16	0.230962
10	124233181	rs79043147	T	C	0.0392715	0.0689866	0.0495406	0.065371	0.102901	0.019	0.0359	NA	23.43	0.6593	9.288e-05	NA	NA	NA	NA	NA
10	124243587	rs4752701	G	A	0.0378486	0.0482295	0.0323612	0.0500589	0.0774291	0.014	0.0222	NA	13.61	0.6937	0.00673159	-0.367074	0.100821	0.692758	0.000271741	0.100821
10	124248242	rs12267142	G	C	0.054354	0.0750916	0.0553336	0.0730271	0.120614	0.04	0.0435	NA	15.45	0.7269	0.0028072	-0.320225	0.0819918	0.725986	9.4e-05	0.0819918
10	124249118	rs17624021	T	C	0.0369949	0.0457875	0.0399521	0.0612485	0.0858637	0.023	0.0424	0.0414	13	0.7106	0.00835468	-0.363896	0.0964983	0.694964	0.00016259	0.0964983
10	124251239	rs56126053	T	C	0.054354	0.0750916	0.0539353	0.0724382	0.119265	0.04	0.0433	NA	16.48	0.7185	0.00183446	-0.329702	0.0822154	0.719138	6.07e-05	0.0822154
10	124256653	rs79369894	T	C	0.0546386	0.0769231	0.0549341	0.0724382	0.120783	0.039	0.045	NA	16.61	0.7189	0.0017748	-0.327735	0.0816181	0.720554	5.93e-05	0.0816181
10	124256705	rs72834480	T	C	0.0546386	0.0769231	0.0545346	0.0718492	0.120277	0.039	0.0438	NA	16.57	0.7188	0.00178429	-0.330062	0.08213	0.718879	5.85e-05	0.08213
10	124259510	rs4752702	A	G	0.054354	0.0750916	0.054135	0.0718492	0.119265	0.039	0.0444	NA	15.79	0.7233	0.00250914	NA	NA	NA	NA	NA
10	124264096	rs2943483	A	G	0.0367103	0.0457875	0.0419497	0.0630153	0.087888	0.027	0.046	NA	12.44	0.7181	0.0100632	-0.354376	0.0952801	0.701611	0.000199765	0.0952801
10	124267173	rs3013206	T	A	0.037564	0.0457875	0.0423492	0.0671378	0.0899123	0.027	0.0461	NA	14.8	0.7006	0.00378687	-0.381103	0.0938855	0.683107	4.92e-05	0.0938855
10	124267751	rs72834494	G	A	0.0546386	0.0769231	0.0551338	0.0712603	0.120614	0.041	0.0452	NA	15.45	0.7269	0.0028072	-0.314677	0.0815584	0.730024	0.000114175	0.0815584
